# Supplementary figures and images for: Photovoltaic performance of PPE-PPV copolymers: effect of the fullerene component
Source: Royal Society of Chemistry journal article supplement (doi:10.1039/c0jm02681f), 2010-12-23

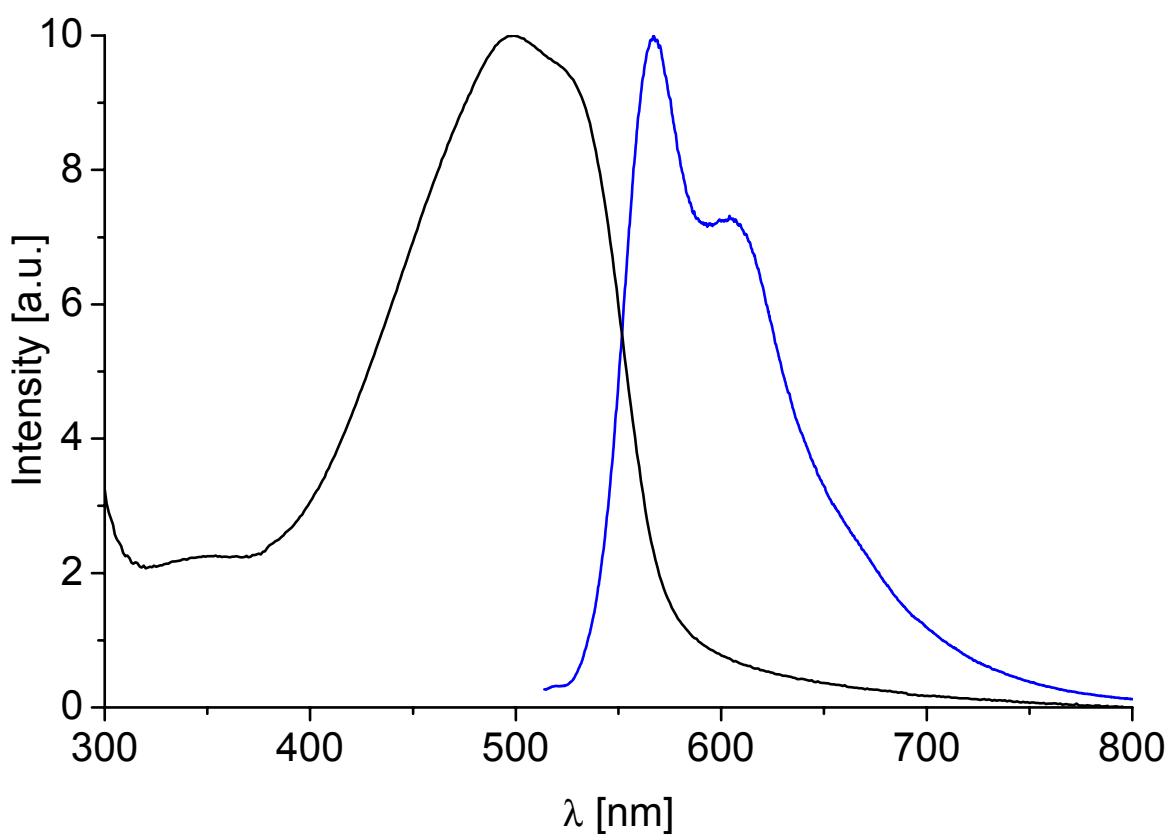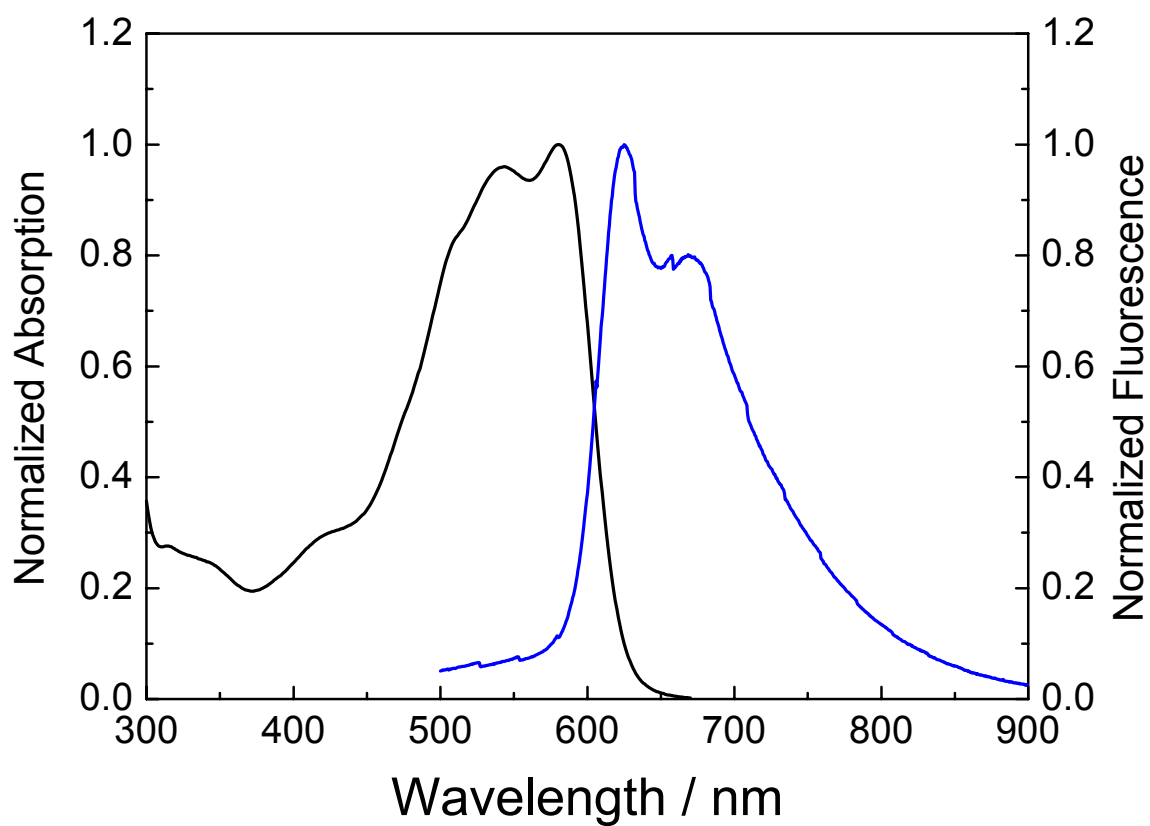

Supplement: c0jm02681f.pdf [file c0jm02681f.pdf]
